# Supplementary material
Source: PubMed Central journal article supplement (PMC2765503)
Supplement: NIHMS108682-supplement-1_si_001.pdf [file NIHMS108682-supplement-1_si_001.pdf]

**Supporting Information for**  
**Preparation of Mammalian Expression Vectors Incorporating**  
**Site-Specifically Platinated-DNA Lesions**

Wee Han Ang, William Wesley Brown, Stephen J. Lippard\*

*Department of Chemistry, Massachusetts Institute of Technology, 77 Massachusetts Ave.,*

*Cambridge, Massachusetts 02139.*

\*To whom correspondence should be addressed. E-mail: [lippard@mit.edu](mailto:lippard@mit.edu)

*Running Title: Site-Specifically Platinated Mammalian Expression Vectors*

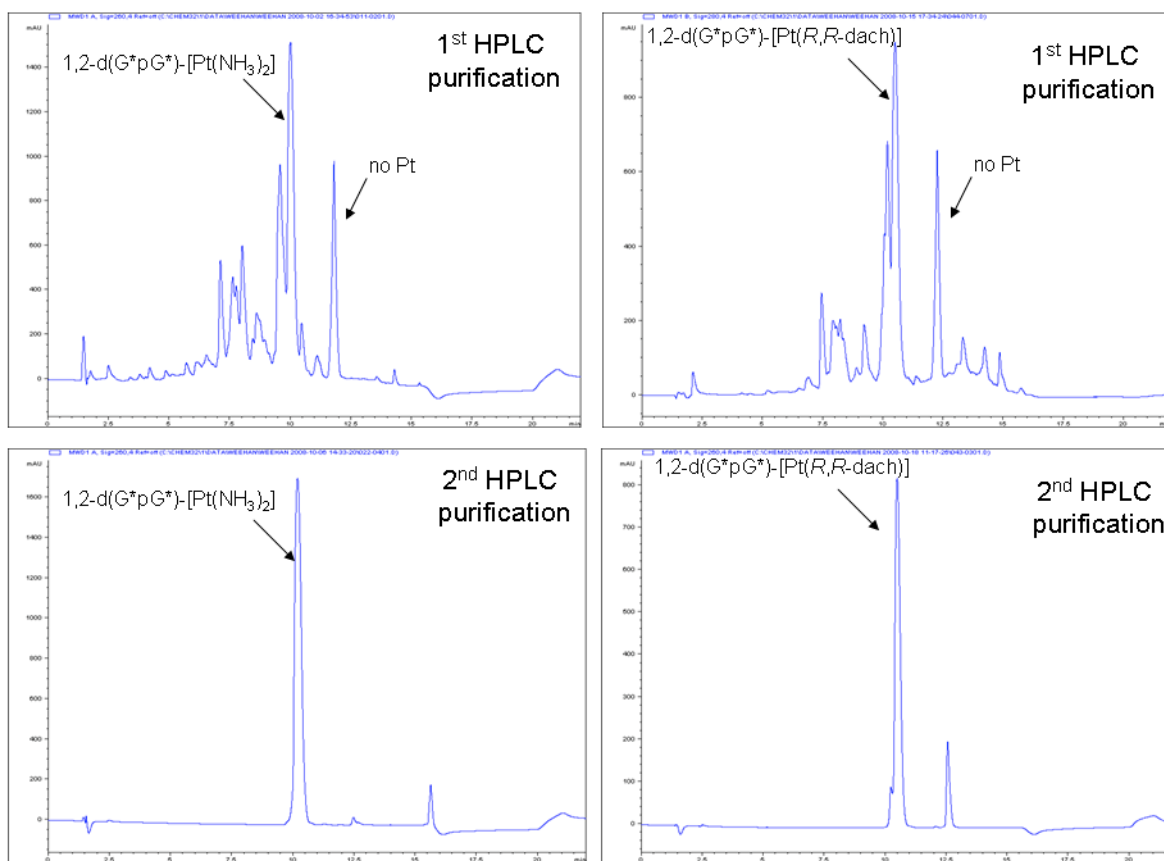

**Figure S1.** HPLC purification of platinumated 13-mer insertion strands; 13-is-Pt (left panel) and 13-is-oxPt (right panel).

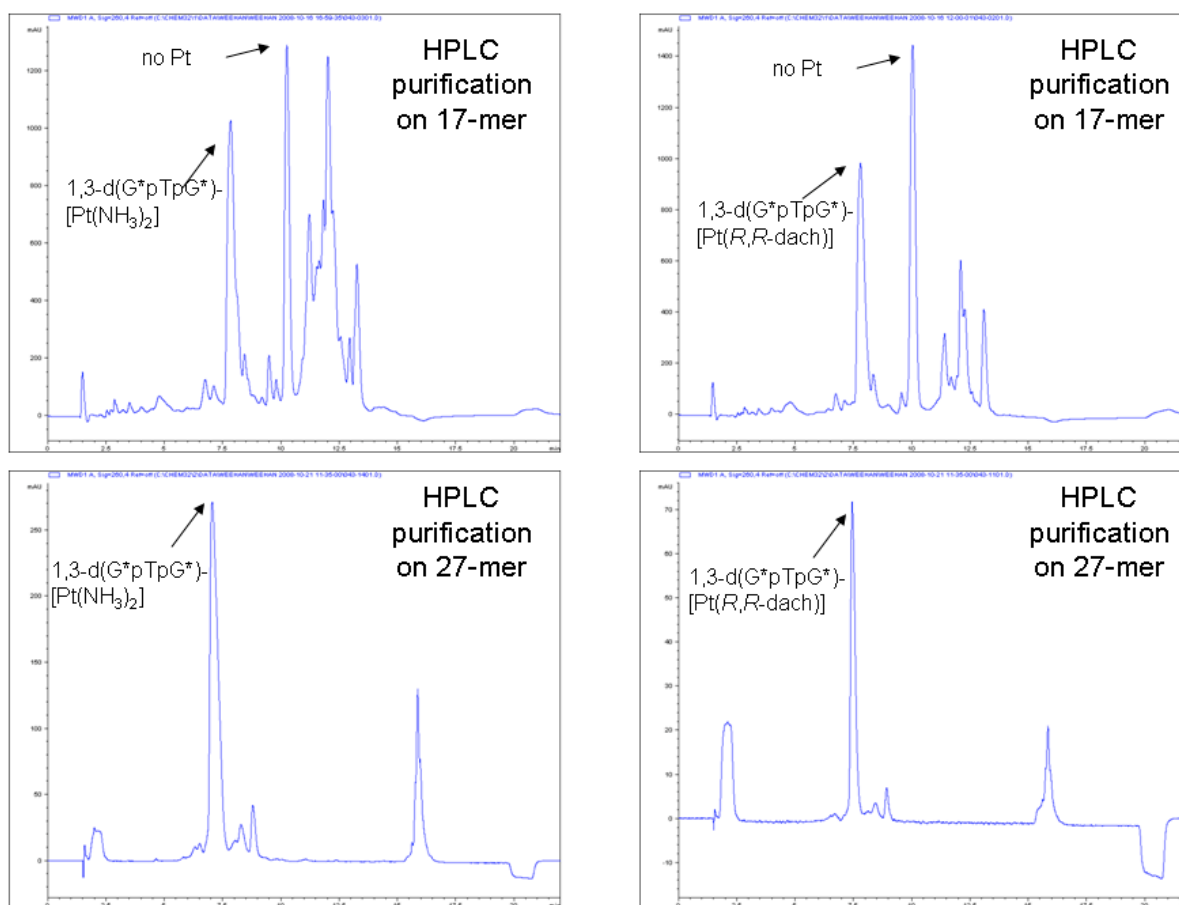

**Figure S2.** HPLC purification of platinumated 27-mer insertion strands, 27-is-Pt (left panel) and 27-is-oxPt (right panel); top panel depicts HPLC purification of platinumated 17-mer strand, bottom panel depicts denaturing HPLC purification of ligated 27-mer strands.

**Table S1.** Characterization of the Insertion Strand by Nucleotide Composition Analysis<sup>a</sup> and MALDI-TOF MS.

| insertion strand | Nucleotide composition analysis |       |      |       |      |       |      |       | MALDI-TOF MS |       |
|------------------|---------------------------------|-------|------|-------|------|-------|------|-------|--------------|-------|
|                  | dC                              |       | dG   |       | T    |       | dA   |       | (m/z)        |       |
|                  | obsd                            | calcd | obsd | calcd | obsd | calcd | obsd | calcd | obsd         | calcd |
| 13-is            | 6.2                             | 6     | 3.0  | 3     | 2.0  | 2     | 1.8  | 2     | 3894         | 3895  |
| 13-is-Pt         | 6.1                             | 6     | 1.1  | 1     | 2.0  | 2     | 1.7  | 2     | 4123         | 4124  |
| 13-is-oxPt       | 6.2                             | 6     | 1.0  | 1     | 2.0  | 2     | 1.8  | 2     | 4204         | 4202  |
| 27-is            | 14.8                            | 15    | 3.1  | 3     | 7.1  | 7     | 1.9  | 2     | 8022         | 8018  |
| 27-is-Pt         | 15.2                            | 15    | 1.2  | 1     | 6.9  | 7     | 1.8  | 2     | 8245         | 8247  |
| 27-is-oxPt       | 15.3                            | 15    | 1.0  | 1     | 7.1  | 7     | 1.6  | 2     | 8328         | 8325  |

<sup>a</sup>The insertion strand (500 pmol) was digested with nuclease S1 (10 U) for 12 h at 37 °C followed by calf intestinal phosphatase (10 U) for 4 h at 37 °C. Analyses of digests were carried out using reverse-phase HPLC with Supelcosil LC-18-S column; the gradient used was 5-15% B over 30 min, where solvent A contained 10 mM NaOAc and solvent B contained 100% methanol.
